# Supplementary figures and images for: Effects of armed conflict on maternal and infant health: a mixed-methods study of Armenia and the 2020 Nagorno-Karabakh war
Source: HighWire-hosted journal article supplement (doi:10.1136/bmjopen-2023-076171), 2023-12-01

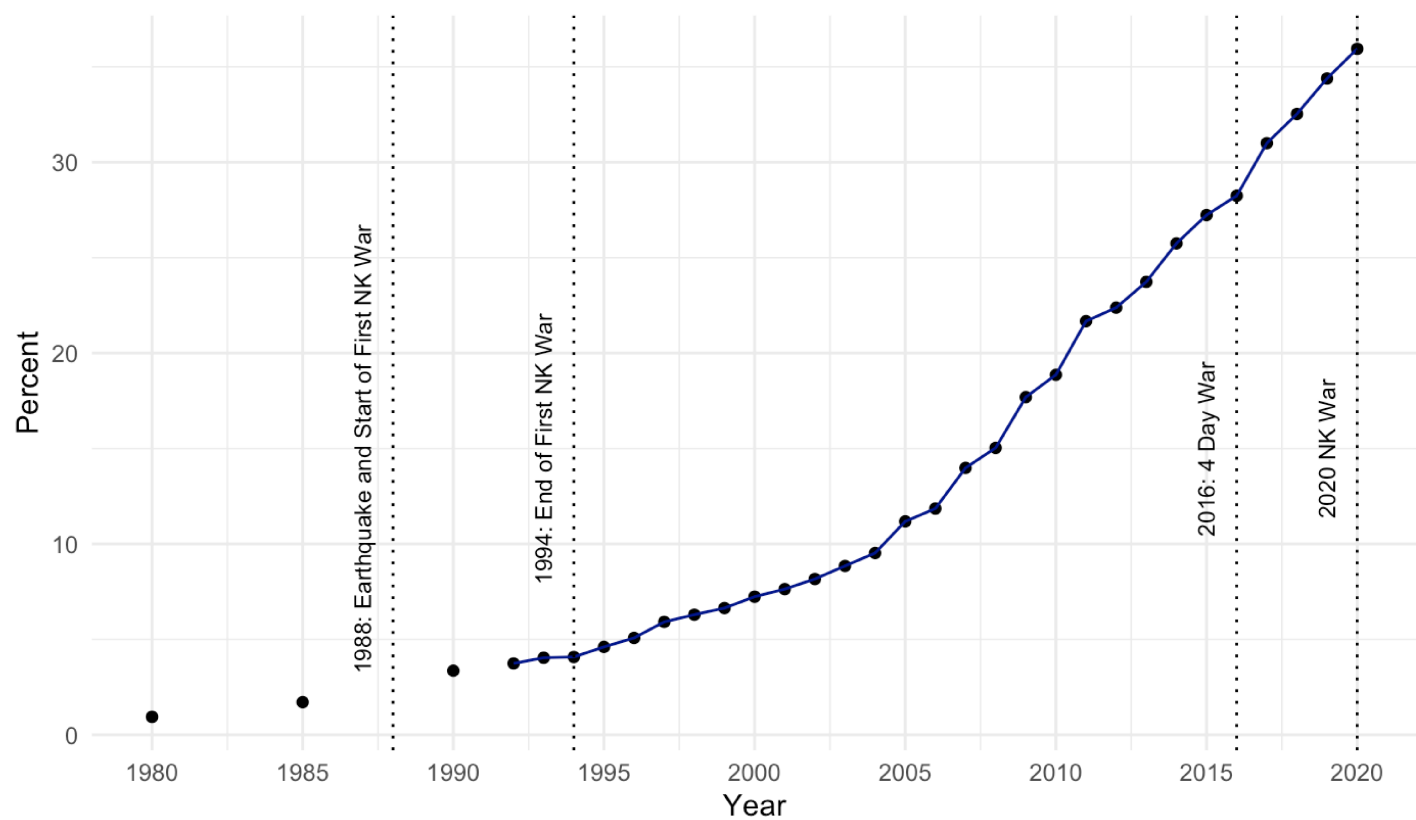

Supplement: bmjopen-2023-076171supp006_data_supplement.pdf [file bmjopen-2023-076171supp006_data_supplement.pdf]
